# Supplementary material
Source: Springer Nature journal article supplement (https://www.springermedizin.de/resource/supplementary/12985_2014_2444_MOESM3_ESM.pdf/9606750)
Supplement: MOESM3 [file 9606750]

MS2-HHR2: cuAGGUCACCGGAUUAUCCGGUCU . . . . . GAUGAGUCCGUGAGGACGAAACCUag

24-nt deletion: cuAGGUCACCGGAUUAUCCGGUCU . . . . . ag

20-nt deletion: cuAGGUCACCGGAUUAUCC . . . . . ACGAAACCUag

14-nt deletion: cuAGGUCACCGGAUUAUCCGGUCU . . . . . UACGAAACCUag

18-nt insertion: cuAGGUCACCGGAUUAUCCGGUCUACCGGAUUAUCCGGUCUGAUGAGUCCGUGAGGACGAAACCUag
